# Supplementary material
Source: PubMed Central journal article supplement (PMC9989840)
Supplement: djab105_supplementary_data.pdf [file djab105_supplementary_data.pdf]

## Supplementary Materials

Supplementary Table 1. Test of parallel trends: changes in outcomes using 2013 as a pseudo-policy change year among newly diagnosed young adult cancer patients aged 18-39 years, 2011-2013

| Outcome                   | Adjusted DD <sup>a</sup> (95% CI), Percentage points | <i>P</i> <sup>b</sup> |
|---------------------------|------------------------------------------------------|-----------------------|
| Health insurance status   |                                                      |                       |
| Uninsured                 | -0.8 (-1.4, -0.2)                                    | 0.01                  |
| Medicaid                  | 1.3 (0.5, 2.1)                                       | 0.002                 |
| Private insurance         | 0.0 (-1.0, 1.0)                                      | 0.99                  |
| Cancer Stage at Diagnosis |                                                      |                       |
| Stage I                   | 1.1 (-0.1, 2.3)                                      | 0.07                  |
| Stage IV                  | 0.7 (-0.1, 1.5)                                      | 0.08                  |

<sup>a</sup>Adjusted difference-in-difference (DD) estimate for each outcome is the regression coefficient on an interaction term between residence in expansion states and an indicator for a pseudo-policy change (2013 vs. 2011-2012), with regression models also controlling for sex, age group, race/ethnicity, zip-code level income, and MSA, as well as residence state adjusted as a random effect. Data limited to the pre-expansion period only. CI: confidence interval.

<sup>b</sup>*P* values were calculated from linear probability regression models and reflect two-sided test of statistical significance.

Supplementary Table 2: Changes in health insurance coverage associated with Medicaid expansion by sociodemographic factors among newly diagnosed cancer patients aged 18-39 years, 2011-2016<sup>a</sup>

| Outcomes (by sociodemographic factors)    | Expansion states |            |                                   | Non-expansion states |            |                                   | Crude model       |                       | Adjusted model <sup>b</sup> |                       |
|-------------------------------------------|------------------|------------|-----------------------------------|----------------------|------------|-----------------------------------|-------------------|-----------------------|-----------------------------|-----------------------|
|                                           | Pre-ME, %        | Post-ME, % | Absolute Difference (95% CI), ppt | Pre-ME, %            | Post-ME, % | Absolute Difference (95% CI), ppt | DD (95% CI), ppt  | <i>P</i> <sup>c</sup> | DD (95% CI), ppt            | <i>P</i> <sup>c</sup> |
| By age group                              |                  |            |                                   |                      |            |                                   |                   |                       |                             |                       |
| Uninsured                                 |                  |            |                                   |                      |            |                                   |                   |                       |                             |                       |
| 18-25 years                               | 6.5              | 2.7        | -3.9 (-4.3, -3.5)                 | 14.1                 | 11.2       | -2.9 (-3.9, -2.0)                 | -1.0 (-2.0, 0.1)  | 0.0688                | -1.0 (-1.9, -0.1)           | 0.0337                |
| 26-34 years                               | 6.6              | 3.3        | -3.4 (-3.7, -3.1)                 | 13.8                 | 11.2       | -2.6 (-3.1, -2.0)                 | -0.8 (-1.5, -0.2) | 0.0151                | -0.8 (-1.4, -0.2)           | 0.0064                |
| 35-39 years                               | 5.8              | 3.0        | -2.8 (-3.1, -2.5)                 | 11.7                 | 10.3       | -1.4 (-2.0, -0.9)                 | -1.4 (-2.0, -0.7) | <0.001                | -1.3 (-1.9, -0.8)           | <0.001                |
| Medicaid                                  |                  |            |                                   |                      |            |                                   |                   |                       |                             |                       |
| 18-25 years                               | 18.6             | 23.3       | 4.7 (3.8, 5.5)                    | 15.6                 | 13.9       | -1.8 (-2.8, -0.8)                 | 6.4 (5.1, 7.7)    | <0.001                | 5.9 (4.6, 7.3)              | <0.001                |
| 26-34 years                               | 17.9             | 22.7       | 4.9 (4.3, 5.4)                    | 14.6                 | 13.5       | -1.2 (-1.8, -0.6)                 | 6.0 (5.2, 6.9)    | <0.001                | 5.6 (4.7, 6.4)              | <0.001                |
| 35-39 years                               | 15.6             | 19.9       | 4.3 (3.8, 4.9)                    | 13.0                 | 12.0       | -0.9 (-1.5, -0.3)                 | 5.3 (4.4, 6.1)    | <0.001                | 5.0 (4.2, 5.8)              | <0.001                |
| Private                                   |                  |            |                                   |                      |            |                                   |                   |                       |                             |                       |
| 18-25 years                               | 70.5             | 70.9       | 0.3 (-0.6, 1.3)                   | 63.6                 | 69.4       | 5.8 (4.5, 7.1)                    | -5.4 (-7.1, -3.8) | <0.001                | -5.1 (-6.6, -3.6)           | <0.001                |
| 26-34 years                               | 70.2             | 69.8       | -0.4 (-1.0, 0.2)                  | 64.6                 | 68.9       | 4.3 (3.5, 5.1)                    | -4.7 (-5.7, -3.7) | <0.001                | -4.5 (-5.4, -3.5)           | <0.001                |
| 35-39 years                               | 73.1             | 72.4       | -0.7 (-1.3, -0.1)                 | 67.7                 | 70.5       | 2.8 (2.0, 3.7)                    | -3.5 (-4.6, -2.5) | <0.001                | -3.5 (-4.5, -2.5)           | <0.001                |
| By race/ethnicity                         |                  |            |                                   |                      |            |                                   |                   |                       |                             |                       |
| Uninsured                                 |                  |            |                                   |                      |            |                                   |                   |                       |                             |                       |
| Non-Hispanic White                        | 4.9              | 1.8        | -3.0 (-3.2, -2.8)                 | 8.9                  | 6.4        | -2.5 (-2.9, -2.2)                 | -0.5 (-0.9, -0.1) | 0.0224                | -0.4 (-0.8, -0.1)           | 0.0267                |
| Non-Hispanic Black                        | 8.8              | 3.0        | -5.8 (-6.4, -5.1)                 | 15.5                 | 12.7       | -2.8 (-3.8, -1.8)                 | -3.0 (-4.2, -1.8) | <0.001                | -2.3 (-3.5, -1.1)           | <0.001                |
| Hispanic                                  | 14.0             | 9.3        | -4.7 (-5.5, -3.9)                 | 30.7                 | 31.2       | 0.5 (-1.0, 1.9)                   | -5.1 (-6.8, -3.5) | <0.001                | -4.7 (-6.2, -3.2)           | <0.001                |
| Medicaid                                  |                  |            |                                   |                      |            |                                   |                   |                       |                             |                       |
| Non-Hispanic White                        | 12.5             | 16.6       | 4.1 (3.7, 4.5)                    | 11.6                 | 10.6       | -1.0 (-1.4, -0.5)                 | 5.1 (4.5, 5.7)    | <0.001                | 4.7 (4.1, 5.3)              | <0.001                |
| Non-Hispanic Black                        | 31.4             | 37.7       | 6.3 (4.9, 7.7)                    | 24.2                 | 23.7       | -0.5 (-1.7, 0.8)                  | 6.8 (4.9, 8.7)    | <0.001                | 6.7 (4.8, 8.5)              | <0.001                |
| Hispanic                                  | 32.4             | 37.7       | 5.3 (4.1, 6.5)                    | 16.5                 | 13.4       | -3.1 (-4.2, -1.9)                 | 8.3 (6.7, 10.0)   | <0.001                | 8.4 (6.7, 10.1)             | <0.001                |
| Private                                   |                  |            |                                   |                      |            |                                   |                   |                       |                             |                       |
| Non-Hispanic White                        | 78.1             | 77.6       | -0.4 (-0.9, 0.01)                 | 73.1                 | 77.3       | 4.2 (3.6, 4.8)                    | -4.7 (-5.4, -3.9) | <0.001                | -4.6 (-5.3, -3.9)           | <0.001                |
| Non-Hispanic Black                        | 52.1             | 53.0       | 0.9 (-0.6, 2.3)                   | 51.8                 | 55.4       | 3.6 (2.1, 5.0)                    | -2.7 (-4.7, -0.6) | 0.0099                | -3.6 (-5.6, -1.6)           | <0.001                |
| Hispanic                                  | 46.6             | 48.5       | 1.9 (0.6, 3.1)                    | 44.6                 | 47.5       | 3.0 (1.4, 4.5)                    | -1.1 (-3.1, 0.9)  | 0.2813                | -1.5 (-3.4, 0.5)            | 0.1415                |
| By zip-code level median household income |                  |            |                                   |                      |            |                                   |                   |                       |                             |                       |
| Uninsured                                 |                  |            |                                   |                      |            |                                   |                   |                       |                             |                       |

|                                                         |      |      |                     |      |      |                   |                   |        |                   |        |
|---------------------------------------------------------|------|------|---------------------|------|------|-------------------|-------------------|--------|-------------------|--------|
| High (>401 FPL)                                         | 2.6  | 1.5  | -1.0 (-1.4, -0.6)   | 5.0  | 4.4  | -0.6 (-1.6, 0.4)  | -0.4 (-1.5, 0.6)  | 0.4363 | -0.6 (-1.5, 0.3)  | 0.1929 |
| Middle (139-400)                                        | 6.5  | 3.1  | -3.4 (-3.6, -3.1)   | 12.8 | 10.5 | -2.3 (-2.7, -1.9) | -1.0 (-1.5, -0.6) | <0.001 | -1.1 (-1.5, -0.7) | <0.001 |
| Low (≤138 FPL)                                          | 9.9  | 4.9  | -5.0 (-5.9, -4.0)   | 20.4 | 18.7 | -1.7 (-3.3, -0.2) | -3.2 (-5.0, -1.4) | <0.001 | -2.9 (-4.6, -1.2) | 0.0010 |
| Medicaid                                                |      |      |                     |      |      |                   |                   |        |                   |        |
| High (>401 FPL)                                         | 5.0  | 7.0  | 2.0 (1.4, 2.7)      | 3.0  | 2.4  | -0.5 (-1.3, 0.2)  | 2.6 (1.6, 3.6)    | <0.001 | 2.5 (1.3, 3.7)    | <0.001 |
| Middle (139-400)                                        | 17.2 | 22.2 | 5.0 (4.6, 5.4)      | 13.8 | 12.6 | -1.2 (-1.6, -0.8) | 6.2 (5.7, 6.8)    | <0.001 | 5.5 (4.9, 6.1)    | <0.001 |
| Low (≤138 FPL)                                          | 35.0 | 41.9 | 6.9 (5.1, 8.6)      | 24.7 | 23.0 | -1.7 (-3.4, -0.1) | 8.6 (6.2, 11.0)   | <0.001 | 7.5 (5.1, 9.9)    | <0.001 |
| Private                                                 |      |      |                     |      |      |                   |                   |        |                   |        |
| High (>401 FPL)                                         | 89.4 | 88.8 | -0.6 (-1.4, 0.3)    | 83.4 | 86.4 | 3.0 (1.3, 4.7)    | -3.6 (-5.5, -1.7) | <0.001 | -3.3 (-5.0, -1.6) | <0.001 |
| Middle (139-400)                                        | 71.2 | 70.4 | -0.8 (-1.2, -0.3)   | 66.5 | 70.6 | 4.1 (3.5, 4.7)    | -4.9 (-5.6, -4.1) | <0.001 | -4.3 (-5.0, -3.6) | <0.001 |
| Low (≤138 FPL)                                          | 46.3 | 46.7 | 0.4 (-1.4, 2.2)     | 46.2 | 49.8 | 3.6 (1.7, 5.6)    | -3.2 (-5.9, -0.6) | 0.0161 | -2.9 (-5.4, -0.3) | 0.0293 |
| By residence metropolitan statistical area (MSA) status |      |      |                     |      |      |                   |                   |        |                   |        |
| Uninsured                                               |      |      |                     |      |      |                   |                   |        |                   |        |
| MSA                                                     | 6.0  | 3.1  | -3.0 (-3.2, -2.8)   | 13.1 | 11.0 | -2.1 (-2.5, -1.7) | -0.9 (-1.3, -0.4) | <0.001 | -0.8 (-1.2, -0.4) | <0.001 |
| Non-MSA urban                                           | 8.2  | 2.8  | -5.5 (-6.1, -4.8)   | 12.7 | 10.3 | -2.4 (-3.4, -1.4) | -3.1 (-4.3, -1.9) | <0.001 | -2.8 (-4.0, -1.7) | <0.001 |
| Non-MSA rural                                           | 10.9 | 3.4  | -7.5 (-9.9, -5.1)   | 11.4 | 9.8  | -1.7 (-4.3, 1.0)  | -5.9 (-9.5, -2.3) | 0.0013 | -6.0 (-9.7, -2.4) | 0.0011 |
| Medicaid                                                |      |      |                     |      |      |                   |                   |        |                   |        |
| MSA                                                     | 16.9 | 21.3 | 4.4 (4.1, 4.8)      | 13.3 | 12.0 | -1.3 (-1.7, -0.9) | 5.7 (5.2, 6.3)    | <0.001 | 5.3 (4.7, 5.9)    | <0.001 |
| Non-MSA urban                                           | 19.2 | 25.1 | 5.9 (4.8, 7.1)      | 18.8 | 18.3 | -0.5 (-1.7, 0.7)  | 6.4 (4.7, 8.1)    | <0.001 | 5.7 (4.0, 7.4)    | <0.001 |
| Non-MSA rural                                           | 20.3 | 29.5 | 9.2 (5.1, 13.3)     | 19.0 | 18.0 | -0.9 (-4.3, 2.4)  | 10.1 (4.9, 15.4)  | <0.001 | 10.1 (4.9, 15.2)  | <0.001 |
| Private                                                 |      |      |                     |      |      |                   |                   |        |                   |        |
| MSA                                                     | 72.0 | 71.5 | -0.4 (-0.9, -0.004) | 66.6 | 70.6 | 4.0 (3.4, 4.6)    | -4.5 (-5.2, -3.7) | <0.001 | -4.2 (-4.9, -3.5) | <0.001 |
| Non-MSA urban                                           | 66.7 | 66.5 | -0.2 (-1.5, 1.1)    | 60.3 | 63.6 | 3.3 (1.8, 4.9)    | -3.5 (-5.6, -1.5) | <0.001 | -3.7 (-5.7, -1.7) | <0.001 |
| Non-MSA rural                                           | 62.0 | 61.2 | -0.8 (-5.4, 3.8)    | 62.3 | 63.7 | 1.4 (-2.8, 5.6)   | -2.2 (-8.4, 4.0)  | 0.4845 | -1.9 (-8.0, 4.2)  | 0.5489 |

<sup>a</sup>Authors' analysis of the 2011-2016 National Cancer Database. Abbreviation: DD—difference in difference; ME—Medicaid expansion; ppt—percentage points; FPL—federal poverty level.

<sup>b</sup>Regression models also adjusted for linear time trends, age, sex, race/ethnicity, zip-code level income, and residence metropolitan statistical area status, when applicable, as well as state adjusted as a random effect.

<sup>c</sup>P values were calculated from linear probability regression models and reflect two-sided test of statistical significance.

Supplementary Table 3: Changes in the percentage of stage IV disease at diagnosis associated with Medicaid expansion by sociodemographic factors among newly diagnosed cancer patients aged 18-39 years, 2011-2016<sup>a,b</sup>

| Characteristics                                     | Expansion states |            |                                   | Non-expansion states |            |                                  | Crude model      |                       | Adjusted model <sup>c</sup> |                       |
|-----------------------------------------------------|------------------|------------|-----------------------------------|----------------------|------------|----------------------------------|------------------|-----------------------|-----------------------------|-----------------------|
|                                                     | Pre-ME, %        | Post-ME, % | Absolute Difference (95% CI), ppt | Pre-ME, %            | Post-ME, % | Absolute Difference (95% CI),ppt | DD (95% CI), ppt | <i>P</i> <sup>e</sup> | DD (95% CI), ppt            | <i>P</i> <sup>e</sup> |
| Age group                                           |                  |            |                                   |                      |            |                                  |                  |                       |                             |                       |
| 18-25 years                                         | 12.4             | 12.6       | 0.1 (-0.7, 1.0)                   | 13.0                 | 12.8       | -0.2 (-1.4, 0.9)                 | 0.3 (-1.1, 1.8)  | 0.6432                | 0.3 (-1.1, 1.6)             | 0.7228                |
| 26-34 years                                         | 10.8             | 10.6       | -0.2 (-0.7, 0.3)                  | 11.4                 | 11.8       | 0.5 (-0.2, 1.1)                  | -0.7 (-1.5, 0.1) | 0.0958                | -0.9 (-1.7, -0.2)           | 0.0188                |
| 35-39 years                                         | 11.5             | 11.9       | 0.4 (-0.1, 0.9)                   | 12.2                 | 12.7       | 0.5 (-0.1, 1.2)                  | -0.2 (-1.0, 0.6) | 0.6855                | -0.1 (-0.9, 0.7)            | 0.8450                |
| Race/ethnicity <sup>d</sup>                         |                  |            |                                   |                      |            |                                  |                  |                       |                             |                       |
| Non-Hispanic White                                  | 10.0             | 10.0       | 0.0 (-0.4, 0.4)                   | 10.2                 | 10.7       | 0.5 (-0.01, 1.0)                 | -0.5 (-1.1, 0.1) | 0.1235                | -0.5 (-1.1, 0.1)            | 0.0854                |
| Non-Hispanic Black                                  | 17.3             | 18.1       | 0.8 (-0.4, 2.0)                   | 17.1                 | 18.1       | 1.0 (-0.2, 2.3)                  | -0.2 (-2.0, 1.5) | 0.7816                | -0.1 (-1.8, 1.6)            | 0.9449                |
| Hispanic                                            | 14.1             | 13.8       | -0.3 (-1.3, 0.7)                  | 14.5                 | 14.3       | -0.1 (-1.4, 1.1)                 | -0.2 (-1.8, 1.4) | 0.8127                | -0.3 (-1.8, 1.3)            | 0.7529                |
| Non-Hispanic Other                                  | 11.8             | 12.2       | 0.4 (-0.7, 1.6)                   | 12.7                 | 12.0       | -0.6 (-2.6, 1.3)                 | 1.1 (-1.2, 3.3)  | 0.3563                | 0.6 (-1.6, 2.8)             | 0.5897                |
| Zip-code level median household income <sup>d</sup> |                  |            |                                   |                      |            |                                  |                  |                       |                             |                       |
| High (>400 FPL)                                     | 8.4              | 9.3        | 0.9 (0.0, 1.7)                    | 8.5                  | 8.5        | 0.0 (-1.5, 1.5)                  | 0.9 (-0.9, 2.6)  | 0.3273                | 0.8 (-0.9, 2.5)             | 0.3401                |
| Middle (139-400 FPL)                                | 11.4             | 11.4       | 0.1 (-0.3, 0.4)                   | 11.6                 | 12.1       | 0.5 (0.1, 1.0)                   | -0.5 (-1.0, 0.1) | 0.1172                | -0.6 (-1.1, -0.01)          | 0.0477                |
| Low (≤138 FPL)                                      | 15.5             | 15.1       | -0.4 (-1.9, 1.0)                  | 17.9                 | 17.4       | -0.5 (-2.2, 1.1)                 | 0.1 (-2.1, 2.3)  | 0.9169                | 0.0 (-2.1, 2.2)             | 0.9772                |
| Residence MSA status <sup>d</sup>                   |                  |            |                                   |                      |            |                                  |                  |                       |                             |                       |
| Metropolitan                                        | 11.3             | 11.5       | 0.2 (-0.1, 0.5)                   | 11.8                 | 12.2       | 0.5 (0.03, 1.0)                  | -0.3 (-0.9, 0.3) | 0.3248                | -0.3 (-0.9, 0.2)            | 0.2236                |
| Non-MSA urban                                       | 11.5             | 11.0       | -0.5 (-1.5, 0.5)                  | 13.1                 | 12.8       | -0.3 (-1.5, 0.9)                 | -0.2 (-1.8, 1.4) | 0.7984                | -0.3 (-1.8, 1.3)            | 0.7285                |
| Non-MSA rural                                       | 14.2             | 12.0       | -2.3 (-5.8, 1.3)                  | 13.7                 | 13.6       | -0.1 (-3.4, 3.2)                 | -2.2 (-7.1, 2.7) | 0.3803                | -2.8 (-7.6, 2.0)            | 0.2524                |

<sup>a</sup>Authors' analysis of the 2011-2016 National Cancer Database. Abbreviation: DD—difference in difference; ME—Medicaid expansion; ppt—percentage points; FPL—federal poverty level; MSA—metropolitan statistical area.

<sup>b</sup>Cases without applicable stages (e.g. leukemia, brain tumor) were excluded. Testicular cancer cases were excluded due to high percentage of unknown stage observed exclusively among patients with testicular cancer.

<sup>c</sup>Adjusted model: Regression models also adjusted for linear time trends, age, sex, race/ethnicity, zip-code level income, and residence metropolitan statistical area status, when applicable, as well as state adjusted as a random effect.

<sup>d</sup>Data for unknown categories not shown.

<sup>e</sup>*P* values were calculated from linear probability regression models and reflect two-sided test of statistical significance.

Supplementary Table 4: Changes in the percentage of stage I disease at diagnosis associated with Medicaid expansion among newly diagnosed young adult cancer patients aged 18-39 years, 2011-2016, excluding unknown stage<sup>a,b</sup>

| Cancer site               | Expansion states |            |                                   | Non-expansion states |            |                                   | Crude model      |                       | Adjusted model <sup>c</sup> |                       |
|---------------------------|------------------|------------|-----------------------------------|----------------------|------------|-----------------------------------|------------------|-----------------------|-----------------------------|-----------------------|
|                           | Pre-ME, %        | Post-ME, % | Absolute Difference (95% CI), ppt | Pre-ME, %            | Post-ME, % | Absolute Difference (95% CI), ppt | DD (95% CI), ppt | <i>P</i> <sup>d</sup> | DD (95% CI), ppt            | <i>P</i> <sup>d</sup> |
| All cancer types combined | 54.3             | 56.1       | 1.8 (1.3, 2.3)                    | 51.9                 | 52.4       | 0.5 (-0.2, 1.1)                   | 1.3 (0.5, 2.1)   | 0.0022                | 1.3 (0.5, 2.2)              | 0.0016                |
| Thyroid                   | 96.1             | 97.8       | 1.7 (1.3, 2.1)                    | 94.6                 | 96.9       | 2.3 (1.7, 2.9)                    | -0.6 (-1.3, 0.1) | 0.0947                | -0.7 (-1.4, -0.1)           | 0.0275                |
| Female breast             | 32.6             | 35.2       | 2.6 (1.5, 3.7)                    | 32.7                 | 33.6       | 0.8 (-0.5, 2.2)                   | 1.8 (-0.01, 3.5) | 0.0511                | 1.7 (-0.1, 3.5)             | 0.0615                |
| Melanoma                  | 72.0             | 72.9       | 0.9 (-0.7, 2.4)                   | 69.5                 | 68.4       | -1.1 (-3.3, 1.1)                  | 1.9 (-0.7, 4.6)  | 0.1570                | 2.2 (-0.4, 4.8)             | 0.1035                |
| Colon & rectum            | 17.6             | 18.1       | 0.4 (-1.2, 2.0)                   | 16.6                 | 15.9       | -0.7 (-2.6, 1.2)                  | 1.2 (-1.3, 3.7)  | 0.3586                | 1.1 (-1.4, 3.6)             | 0.3950                |
| Non-Hodgkin lymphoma      | 33.0             | 32.6       | -0.3 (-2.3, 1.6)                  | 31.0                 | 30.6       | -0.3 (-2.8, 2.2)                  | 0.0 (-3.2, 3.2)  | 0.9929                | 0.0 (-3.2, 3.2)             | 0.9998                |
| Cervix                    | 64.3             | 64.1       | -0.2 (-2.4, 1.9)                  | 60.9                 | 59.8       | -1.1 (-3.6, 1.4)                  | 0.8 (-2.4, 4.1)  | 0.6117                | 0.7 (-2.5, 4.0)             | 0.6557                |
| Hodgkin lymphoma          | 10.5             | 10.1       | -0.4 (-1.7, 0.9)                  | 12.5                 | 10.8       | -1.7 (-3.5, 0.1)                  | 1.3 (-0.9, 3.5)  | 0.2437                | 1.2 (-1.0, 3.4)             | 0.2778                |
| Other                     | 48.3             | 49.8       | 1.4 (0.4, 2.5)                    | 48.9                 | 49.8       | 0.9 (-0.4, 2.2)                   | 0.5 (-1.1, 2.2)  | 0.5317                | 1.0 (-0.6, 2.7)             | 0.2106                |

<sup>a</sup>Authors' analysis of the 2011-2016 National Cancer Database. Abbreviation: DD—difference in difference; ME—Medicaid expansion; ppt—percentage points.

<sup>b</sup>Cases without applicable stages (e.g. leukemia, brain tumor) were excluded. Testicular cancer cases were excluded due to high percentage of unknown stage observed exclusively among patients with testicular cancer.

<sup>c</sup>Adjusted model: Regression models also adjusted for age, sex, race/ethnicity, zip-code level income, residence metropolitan statistical area status, and linear time trends, as well as state adjusted as a random effect.

<sup>d</sup>*P* values were calculated from linear probability regression models and reflect two-sided test of statistical significance.

Supplementary Table 5: Changes in the percentage of stage I disease at diagnosis associated with Medicaid expansion by sociodemographic factors among newly diagnosed cancer patients aged 18-39 years, 2011-2016, excluding unknown stage<sup>a,b</sup>

| Characteristics                                     | Expansion states |            |                                   | Non-expansion states |            |                                   | Crude model      |                       | Adjusted model <sup>c</sup> |                       |
|-----------------------------------------------------|------------------|------------|-----------------------------------|----------------------|------------|-----------------------------------|------------------|-----------------------|-----------------------------|-----------------------|
|                                                     | Pre-ME, %        | Post-ME, % | Absolute Difference (95% CI), ppt | Pre-ME, %            | Post-ME, % | Absolute Difference (95% CI), ppt | DD (95% CI), ppt | <i>P</i> <sup>e</sup> | DD (95% CI), ppt            | <i>P</i> <sup>e</sup> |
| Age group                                           |                  |            |                                   |                      |            |                                   |                  |                       |                             |                       |
| 18-25 years                                         | 54.8             | 57.5       | 2.7 (1.4, 4.0)                    | 53.3                 | 53.5       | 0.2 (-1.6, 1.9)                   | 2.5 (0.3, 4.7)   | 0.0264                | 2.6 (0.5, 4.7)              | 0.0173                |
| 26-34 years                                         | 56.4             | 58.2       | 1.9 (1.1, 2.6)                    | 54.1                 | 54.4       | 0.4 (-0.7, 1.4)                   | 1.5 (0.2, 2.8)   | 0.0215                | 1.7 (0.5, 3.0)              | 0.0076                |
| 35-39 years                                         | 52.0             | 53.3       | 1.4 (0.6, 2.2)                    | 49.4                 | 50.1       | 0.7 (-0.3, 1.7)                   | 0.7 (-0.6, 1.9)  | 0.3037                | 0.5 (-0.8, 1.8)             | 0.4421                |
| Race/ethnicity <sup>d</sup>                         |                  |            |                                   |                      |            |                                   |                  |                       |                             |                       |
| Non-Hispanic White                                  | 56.8             | 58.5       | 1.7 (1.1, 2.3)                    | 55.7                 | 56.0       | 0.3 (-0.5, 1.1)                   | 1.4 (0.4, 2.4)   | 0.0070                | 1.4 (0.4, 2.4)              | 0.0076                |
| Non-Hispanic Black                                  | 39.9             | 42.0       | 2.1 (0.5, 3.7)                    | 38.9                 | 38.5       | -0.3 (-1.9, 1.3)                  | 2.4 (0.2, 4.7)   | 0.0360                | 2.3 (0.04, 4.6)             | 0.0464                |
| Hispanic                                            | 50.3             | 51.9       | 1.6 (0.1, 3.1)                    | 48.8                 | 50.1       | 1.3 (-0.5, 3.2)                   | 0.3 (-2.1, 2.6)  | 0.8358                | 0.3 (-2.0, 2.7)             | 0.7762                |
| Non-Hispanic Other                                  | 54.7             | 56.2       | 1.5 (-0.3, 3.3)                   | 52.0                 | 53.6       | 1.5 (-1.5, 4.6)                   | -0.1 (-3.6, 3.5) | 0.9772                | 0.6 (-2.9, 4.1)             | 0.7275                |
| Zip-code level median household income <sup>d</sup> |                  |            |                                   |                      |            |                                   |                  |                       |                             |                       |
| High (>400 FPL)                                     | 59.7             | 60.8       | 1.1 (-0.5, 2.6)                   | 59.7                 | 58.8       | -1.0 (-3.6, 1.7)                  | 2.0 (-1.0, 5.1)  | 0.1933                | 1.8 (-1.2, 4.8)             | 0.2485                |
| Middle (139-400 FPL)                                | 54.3             | 55.9       | 1.6 (1.1, 2.2)                    | 52.5                 | 52.7       | 0.2 (-0.5, 0.9)                   | 1.4 (0.5, 2.4)   | 0.0019                | 1.5 (0.6, 2.4)              | 0.0011                |
| Low (≤138 FPL)                                      | 46.2             | 49.7       | 3.5 (1.4, 5.6)                    | 40.8                 | 44.8       | 4.1 (1.8, 6.3)                    | -0.5 (-3.6, 2.5) | 0.7267                | -0.4 (-3.4, 2.6)            | 0.8054                |
| Residence MSA status <sup>d</sup>                   |                  |            |                                   |                      |            |                                   |                  |                       |                             |                       |
| Metropolitan                                        | 54.4             | 56.2       | 1.7 (1.2, 2.3)                    | 52.1                 | 52.7       | 0.6 (-0.2, 1.3)                   | 1.2 (0.3, 2.1)   | 0.0104                | 1.2 (0.3, 2.1)              | 0.0095                |
| Non-MSA urban                                       | 53.7             | 55.4       | 1.7 (0.1, 3.3)                    | 50.5                 | 51.7       | 1.3 (-0.5, 3.1)                   | 0.4 (-2.0, 2.9)  | 0.7295                | 0.6 (-1.8, 3.0)             | 0.6433                |
| Non-MSA rural                                       | 48.7             | 54.9       | 6.2 (0.8, 11.7)                   | 50.9                 | 49.8       | -1.2 (-6.1, 3.8)                  | 7.4 (0.1, 14.7)  | 0.0478                | 8.1 (0.9, 15.3)             | 0.0273                |

<sup>a</sup>Authors' analysis of the 2011-2016 National Cancer Database. Abbreviation: DD—difference in difference; ME—Medicaid expansion; ppt—percentage points; FPL—federal poverty level; MSA—metropolitan statistical area.

<sup>b</sup>Cases without applicable stages (e.g. leukemia, brain tumor) were excluded. Testicular cancer cases were excluded due to high percentage of unknown stage observed exclusively among patients with testicular cancer.

<sup>c</sup>Adjusted model: Regression models also adjusted for linear time trends, age, sex, race/ethnicity, zip-code level income, and residence metropolitan statistical area status, when applicable, as well as state adjusted as a random effect.

<sup>d</sup>Data for unknown categories not shown.

<sup>e</sup>*P* values were calculated from linear probability regression models and reflect two-sided test of statistical significance.

Supplementary Table 6: Changes in the percentage of stage IV disease at diagnosis associated with Medicaid expansion among newly diagnosed young adult cancer patients aged 18-39 years, 2011-2016, excluding unknown stage<sup>a,b</sup>

| Cancer site               | Expansion states |            |                                   | Non-expansion states |            |                                   | Crude model       |                       | Adjusted model <sup>c</sup> |                       |
|---------------------------|------------------|------------|-----------------------------------|----------------------|------------|-----------------------------------|-------------------|-----------------------|-----------------------------|-----------------------|
|                           | Pre-ME, %        | Post-ME, % | Absolute Difference (95% CI), ppt | Pre-ME, %            | Post-ME, % | Absolute Difference (95% CI), ppt | DD (95% CI), ppt  | <i>P</i> <sup>d</sup> | DD (95% CI), ppt            | <i>P</i> <sup>d</sup> |
| All cancer types combined | 11.9             | 12.0       | 0.0 (-0.3, 0.4)                   | 12.6                 | 13.1       | 0.4 (-0.03, 0.9)                  | -0.4 (-0.9, 0.2)  | 0.1841                | -0.5 (-1.0, 0.1)            | 0.0974                |
| Thyroid                   | 0.4              | 0.4        | 0.0 (-0.1, 0.1)                   | 0.4                  | 0.4        | 0.0 (-0.2, 0.2)                   | 0.0 (-0.2, 0.3)   | 0.7618                | 0.0 (-0.2, 0.3)             | 0.7818                |
| Female breast             | 6.0              | 6.2        | 0.2 (-0.3, 0.8)                   | 5.9                  | 6.7        | 0.8 (0.1, 1.5)                    | -0.6 (-1.5, 0.3)  | 0.2164                | -0.5 (-1.4, 0.4)            | 0.2479                |
| Melanoma                  | 3.1              | 3.4        | 0.2 (-0.4, 0.9)                   | 3.2                  | 4.6        | 1.4 (0.5, 2.3)                    | -1.2 (-2.3, -0.1) | 0.0355                | -1.3 (-2.4, -0.2)           | 0.0164                |
| Colon & rectum            | 27.4             | 27.8       | 0.4 (-1.5, 2.3)                   | 28.4                 | 28.6       | 0.2 (-2.2, 2.5)                   | 0.2 (-2.7, 3.2)   | 0.8727                | 0.4 (-2.6, 3.4)             | 0.7934                |
| Non-Hodgkin lymphoma      | 32.9             | 34.0       | 1.1 (-0.8, 3.1)                   | 34.6                 | 35.5       | 0.9 (-1.7, 3.5)                   | 0.3 (-3.0, 3.5)   | 0.8690                | 0.4 (-2.9, 3.6)             | 0.8179                |
| Cervix                    | 7.2              | 7.0        | -0.2 (-1.3, 0.9)                  | 6.5                  | 8.0        | 1.4 (0.1, 2.8)                    | -1.6 (-3.4, 0.1)  | 0.0634                | -1.7 (-3.4, 0.1)            | 0.0612                |
| Hodgkin lymphoma          | 18.5             | 20.8       | 2.3 (0.6, 3.9)                    | 19.2                 | 20.5       | 1.3 (-0.9, 3.5)                   | 1.0 (-1.8, 3.7)   | 0.4905                | 1.1 (-1.6, 3.9)             | 0.4137                |
| Other                     | 21.4             | 20.6       | -0.9 (-1.7, -0.004)               | 21.1                 | 20.9       | -0.2 (-1.3, 0.8)                  | -0.6 (-2.0, 0.7)  | 0.3479                | -1.0 (-2.3, 0.3)            | 0.1474                |

<sup>a</sup>Authors' analysis of the 2011-2016 National Cancer Database. Abbreviation: DD—difference in difference; ME—Medicaid expansion; ppt—percentage points.

<sup>b</sup>Cases without applicable stages (e.g. leukemia, brain tumor) were excluded. Testicular cancer cases were excluded due to high percentage of unknown stage observed exclusively among patients with testicular cancer.

<sup>c</sup>Adjusted model: Regression models also adjusted for age, sex, race/ethnicity, zip-code level income, residence metropolitan statistical area status, and linear time trends, as well as state adjusted as a random effect.

<sup>d</sup>*P* values were calculated from linear probability regression models and reflect two-sided test of statistical significance.

Supplementary Table 7: Changes in in the percentage of stage IV disease at diagnosis associated with Medicaid expansion by sociodemographic factors among newly diagnosed cancer patients aged 18-39 years, 2011-2016, excluding unknown stage<sup>a,b</sup>

| Characteristics                                     | Expansion states |            |                                   | Non-expansion states |            |                                   | Crude model      |                       | Adjusted model <sup>c</sup> |                       |
|-----------------------------------------------------|------------------|------------|-----------------------------------|----------------------|------------|-----------------------------------|------------------|-----------------------|-----------------------------|-----------------------|
|                                                     | Pre-ME, %        | Post-ME, % | Absolute Difference (95% CI), ppt | Pre-ME, %            | Post-ME, % | Absolute Difference (95% CI), ppt | DD (95% CI), ppt | <i>P</i> <sup>e</sup> | DD (95% CI), ppt            | <i>P</i> <sup>e</sup> |
| Age group                                           |                  |            |                                   |                      |            |                                   |                  |                       |                             |                       |
| 18-25 years                                         | 13.3             | 13.3       | 0.1 (-0.8, 1.0)                   | 13.9                 | 13.8       | -0.1 (-1.4, 1.1)                  | 0.2 (-1.3, 1.7)  | 0.8058                | 0.1 (-1.4, 1.6)             | 0.8931                |
| 26-34 years                                         | 11.4             | 11.1       | -0.3 (-0.7, 0.2)                  | 12.0                 | 12.5       | 0.5 (-0.2, 1.1)                   | -0.7 (-1.5, 0.1) | 0.0918                | -1.0 (-1.8, -0.2)           | 0.0148                |
| 35-39 years                                         | 12.1             | 12.4       | 0.3 (-0.2, 0.9)                   | 12.8                 | 13.4       | 0.6 (-0.1, 1.2)                   | -0.2 (-1.1, 0.6) | 0.6195                | -0.1 (-0.9, 0.7)            | 0.8007                |
| Race/ethnicity <sup>d</sup>                         |                  |            |                                   |                      |            |                                   |                  |                       |                             |                       |
| Non-Hispanic White                                  | 10.5             | 10.5       | 0.0 (-0.4, 0.3)                   | 10.8                 | 11.2       | 0.5 (-0.04, 1.0)                  | -0.5 (-1.2, 0.1) | 0.1131                | -0.5 (-1.2, 0.1)            | 0.0899                |
| Non-Hispanic Black                                  | 18.4             | 19.2       | 0.8 (-0.5, 2.1)                   | 18.0                 | 19.1       | 1.1 (-0.2, 2.4)                   | -0.3 (-2.1, 1.5) | 0.7485                | -0.2 (-2.0, 1.6)            | 0.8119                |
| Hispanic                                            | 14.9             | 14.5       | -0.4 (-1.5, 0.6)                  | 15.3                 | 15.3       | 0.0 (-1.3, 1.3)                   | -0.4 (-2.1, 1.3) | 0.6175                | -0.6 (-2.3, 1.1)            | 0.4790                |
| Non-Hispanic Other                                  | 12.3             | 12.7       | 0.4 (-0.8, 1.6)                   | 13.4                 | 12.7       | -0.7 (-2.8, 1.4)                  | 1.1 (-1.3, 3.5)  | 0.3574                | 0.6 (-1.7, 2.9)             | 0.6059                |
| Zip-code level median household income <sup>d</sup> |                  |            |                                   |                      |            |                                   |                  |                       |                             |                       |
| High (>400 FPL)                                     | 8.8              | 9.6        | 0.9 (-0.03, 1.8)                  | 9.0                  | 9.0        | 0.0 (-1.6, 1.5)                   | 0.9 (-0.9, 2.7)  | 0.3117                | 0.9 (-0.9, 2.7)             | 0.3083                |
| Middle (139-400 FPL)                                | 12.0             | 12.0       | 0.0 (-0.3, 0.4)                   | 12.2                 | 12.8       | 0.6 (0.1, 1.0)                    | -0.5 (-1.1, 0.1) | 0.0900                | -0.6 (-1.2, -0.05)          | 0.0349                |
| Low (≤138 FPL)                                      | 16.4             | 15.9       | -0.5 (-2.0, 1.0)                  | 18.8                 | 18.4       | -0.4 (-2.2, 1.3)                  | -0.1 (-2.4, 2.3) | 0.9555                | -0.2 (-2.5, 2.1)            | 0.8707                |
| Residence MSA status <sup>d</sup>                   |                  |            |                                   |                      |            |                                   |                  |                       |                             |                       |
| Metropolitan                                        | 11.9             | 12.0       | 0.2 (-0.2, 0.5)                   | 12.4                 | 13.0       | 0.5 (0.05, 1.0)                   | -0.4 (-1.0, 0.2) | 0.2471                | -0.4 (-1.0, 0.2)            | 0.1583                |
| Non-MSA urban                                       | 12.1             | 11.6       | -0.6 (-1.6, 0.5)                  | 13.8                 | 13.4       | -0.3 (-1.6, 0.9)                  | -0.2 (-1.9, 1.4) | 0.7835                | -0.3 (-1.9, 1.3)            | 0.7218                |
| Non-MSA rural                                       | 14.9             | 12.4       | -2.5 (-6.2, 1.3)                  | 14.5                 | 14.2       | -0.3 (-3.8, 3.1)                  | -2.1 (-7.2, 2.9) | 0.4111                | -2.9 (-7.9, 2.1)            | 0.2578                |

<sup>a</sup>Authors' analysis of the 2011-2016 National Cancer Database. Abbreviation: DD—difference in difference; ME—Medicaid expansion; ppt—percentage points; FPL—federal poverty level; MSA—metropolitan statistical area.

<sup>b</sup>Cases without applicable stages (e.g. leukemia, brain tumor) were excluded. Testicular cancer cases were excluded due to high percentage of unknown stage observed exclusively among patients with testicular cancer.

<sup>c</sup>Adjusted model: Regression models also adjusted for linear time trends, age, sex, race/ethnicity, zip-code level income, and residence metropolitan statistical area status, when applicable, as well as state adjusted as a random effect.

<sup>d</sup>Data for unknown categories not shown.

<sup>e</sup>*P* values were calculated from linear probability regression models and reflect two-sided test of statistical significance.
